# Supplementary material
Source: JCI journal article supplement (doi:10.1172/jci187653)
Supplement: sd1 [file 1]

## Supplemental data

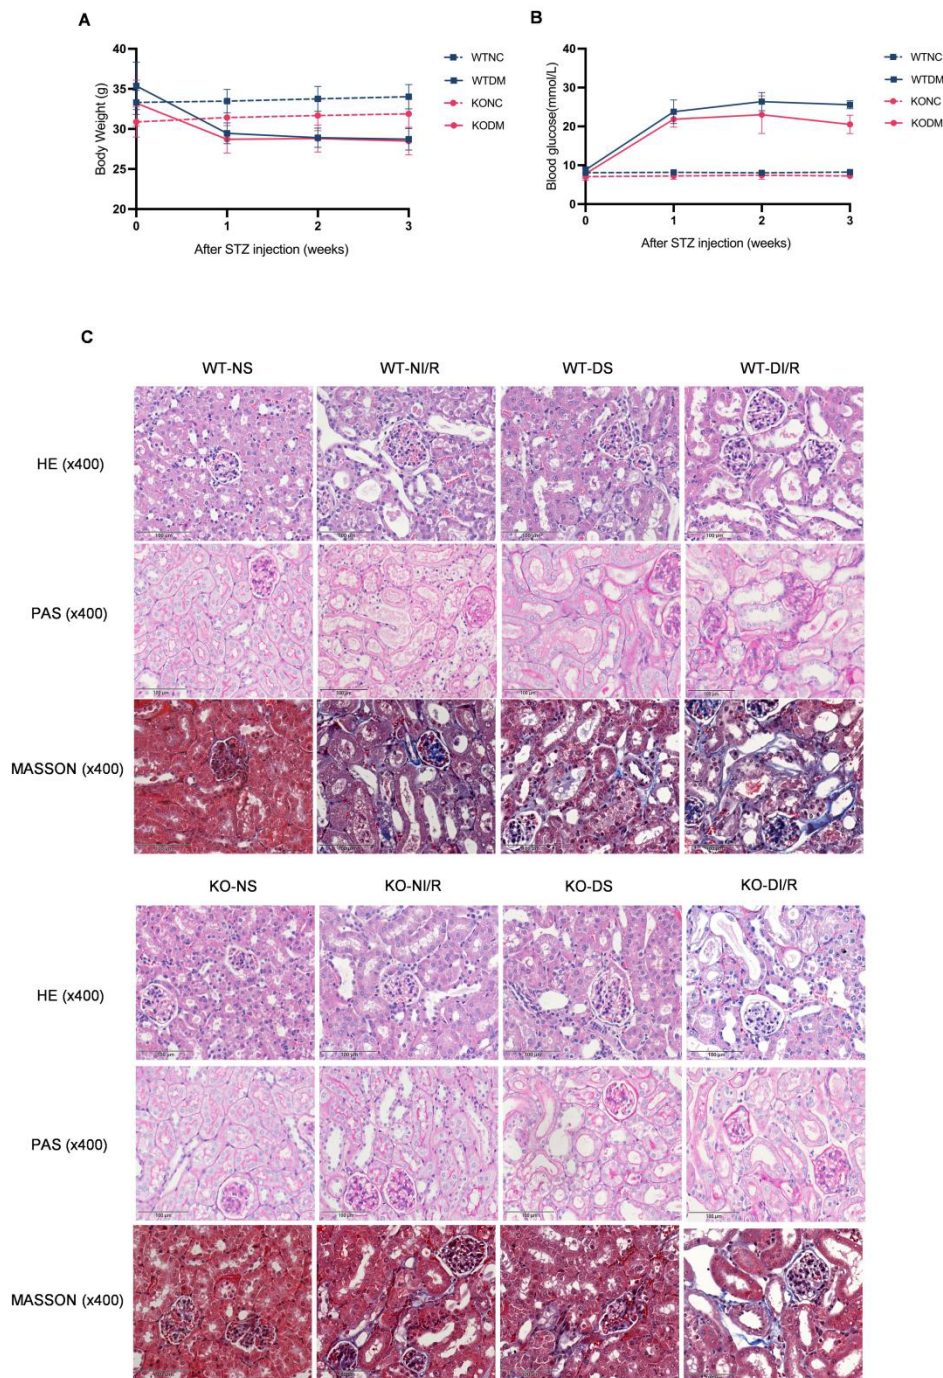

**Supplemental Figure 1.** RasGRP4 did not affect body weight or blood glucose levels but exacerbated renal pathological injury diabetic ischemia-reperfusion injury kidneys.

A: Body weight (n = 10/group); B: blood glucose (n = 10/group); C: HE, PAS and

Masson staining of renal tissues, Scale bars: 100  $\mu\text{m}$ .

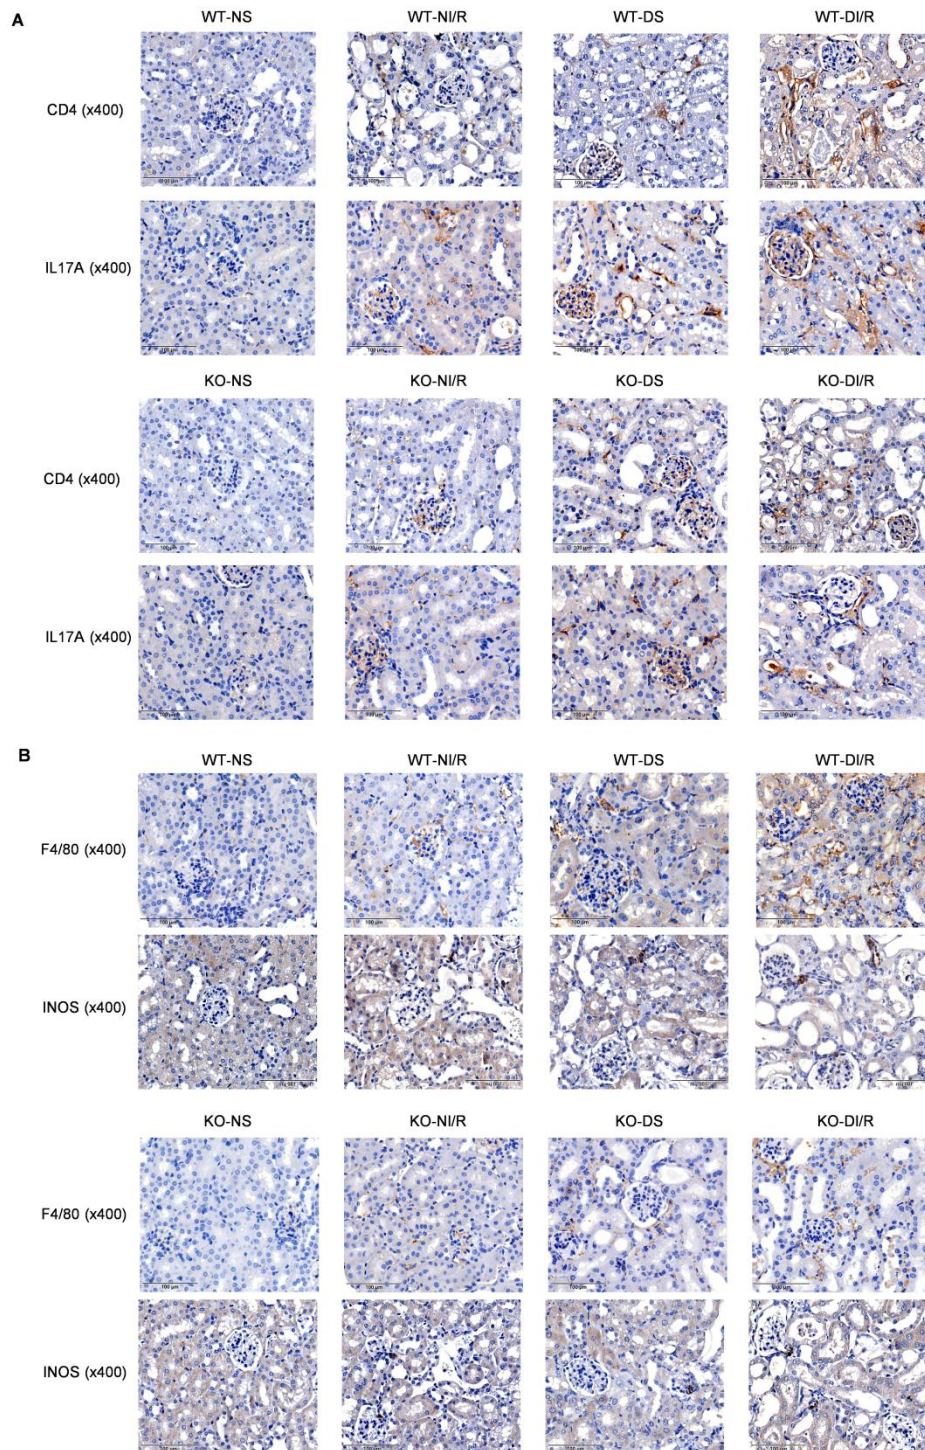

**Supplemental Figure 2.** RasGRP4 promoted infiltration of M1 macrophages and Th17 cells in the kidneys of diabetic ischemia-reperfusion injury.

A: Immunohistochemical staining of CD4 and IL17 in renal, Scale bars: 100  $\mu$ m; B:

Immunohistochemical staining of F4/80 and INOS in kidneys, Scale bars: 100  $\mu$ m.



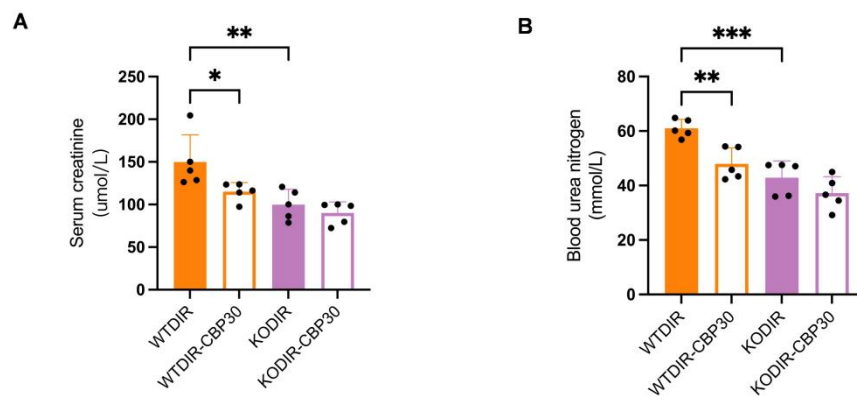

**Supplemental Figure 3.** IL17A inhibitor partially alleviated renal impairment.

A: serum creatinine (n = 5/group); B: blood urea nitrogen (n = 5/group).

\*P < 0.05, \*\*P < 0.01, \*\*\*P < 0.001

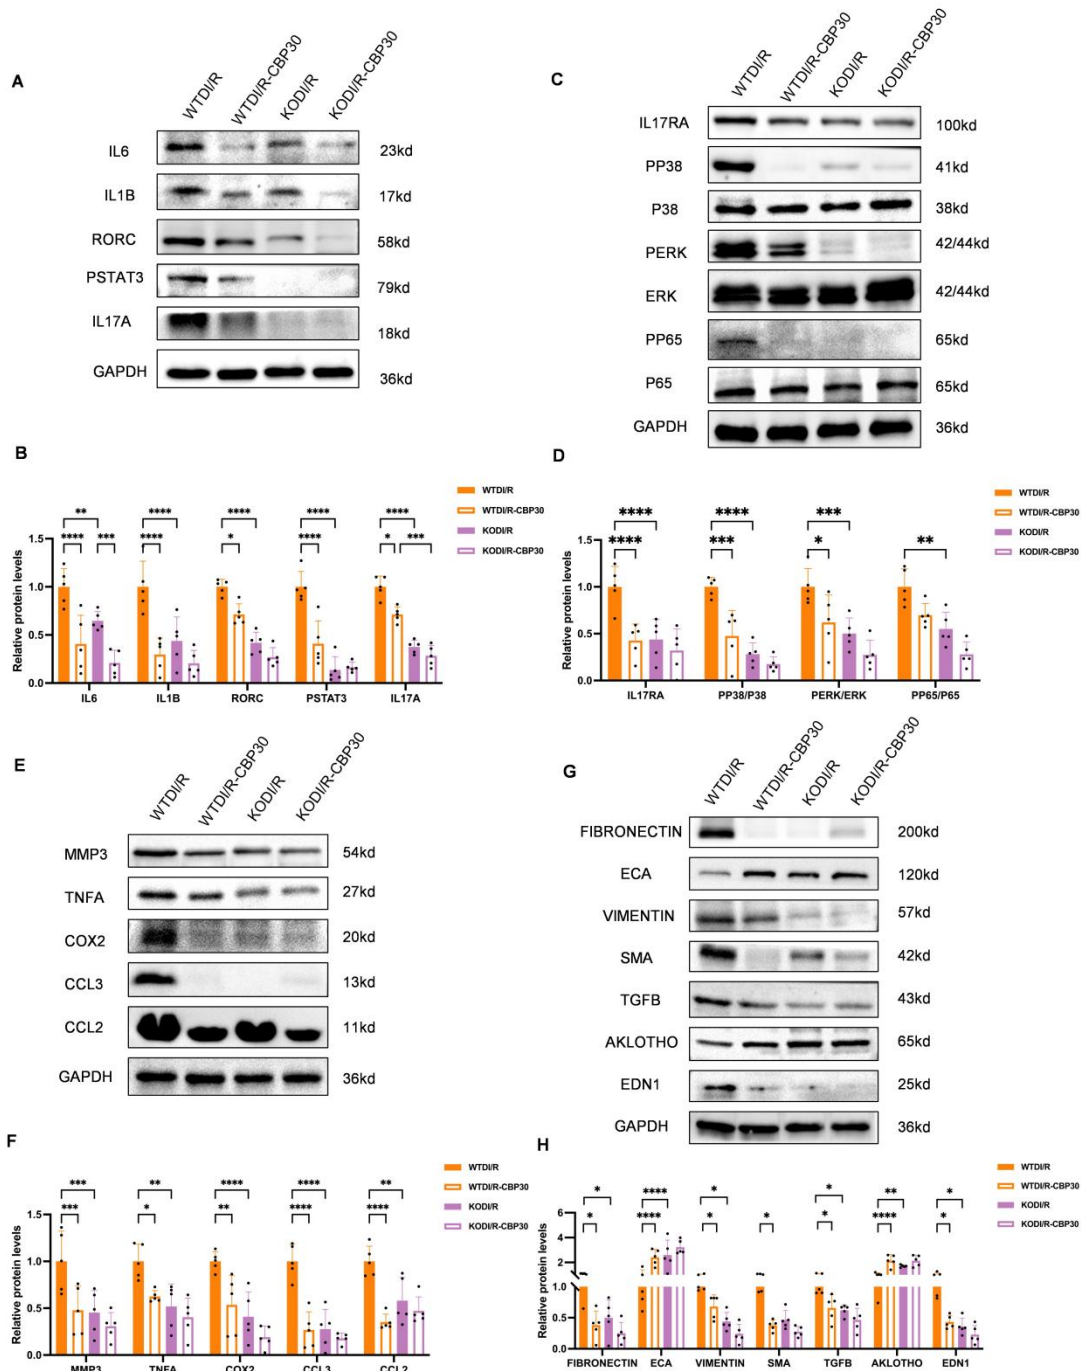

**Supplemental Figure 4.** IL17A inhibitor attenuated Th17 immune response and kidney inflammatory injury to a certain extent.

A-B: The protein expression levels and quantitative analyses of IL6, IL1B, RORC, PSTAT3, and IL17 in renal (n = 5/group); C-D: The protein expression levels and quantitative analyses of IL17RA, PP38/P38, PERK/ERK, and PP65/P65 in renal (n =

5/group); E-F: The protein expression levels and quantitative analyses of MMP3, TNFA, COX2, CCL3, and CCL2 in renal (n = 5/group); G-H: The protein expression levels and quantitative analyses of ECA, VIMENTIN, SMA, TGFB, AKLOTTHO and EDN1 in renal (n = 5/group).

\*P < 0.05, \*\*P < 0.01, \*\*\*P < 0.001, \*\*\*\*P < 0.0001
